# Supplementary material
Source: publisher site journal article supplement (https://www.dovepress.com/article/599543)
Supplement: Supplementary file 1 [file 599543%20Supplementary%20Table%201_1.docx]

| SQUIRE-EDU 2.0 Item | Key Prompt | Present in Manuscript |
| --- | --- | --- |
| 1 | The title indicates a healthcare-improvement initiative | ✅ Done (title states "Development and External Validation …") |
| 2 | Structured abstract (background, problem, methods, intervention, results, conclusions) | ✅ Four-paragraph structured abstract |
| 3 | Nature & significance of local problem | ✅ Introduction para 1–2 |
| 4 | Summary of available knowledge | ✅ Introduction para 3 + refs 1-17 |
| 5 | Rationale for chosen intervention(s) | ✅ Discussion para 1 |
| 6 | Specific aim(s) | ✅ End of Introduction & Abstract |
| 7 | Contextual elements at launch | ✅Materials and Methods (setting, time-frame, data source) |
| 8 | Intervention described for replication | ✅ Methods (1)-(9) + Figure 2 code |
| 9 | Study design to assess impact | ✅ Internal 70/30 split + external test set |
| 10 | Measures (operational definitions, validity, reliability) | ✅ Inter-rater agreement *κ* = 0.940 (Experts A vs B); *κ* = 0.965/0.975 (A/B vs C, respectively) |
| 11 | Analysis methods | ✅ Materials and Methods Statistical Analysis & Results |
| 12 | Ethical considerations | ✅Materials and Methods (ethics approval) |
| 13 | Results (timeline, process/outcomes, unintended effects, missing data) | ✅ Results |
| 14 | Summary of key findings vs. aims | ✅ Conclusion section |
| 15 | Interpretation (mechanism, literature comparison, system impact) | ✅ Discussion para 2-3 |
| 16 | Limitations | ✅Discussion "Limitations" paragraph |
| 17 | Conclusions (usefulness, sustainability, spread, next steps) | ✅ Conclusion & last Discussion para |
| 18 | Funding & role of funders | ✅ Funding statement (three grants) |

Supplementary Table 1: SQUIRE - EDU guidelines

Note: ✅ indicates that the corresponding SQUIRE-EDU item is fully addressed in the manuscript.
